# Supplementary material for: Low-temperature de-alloying and unique self-filling interface optimization mechanism of layered silicon for enhanced lithium storage
Source: Royal Society of Chemistry journal article supplement (doi:10.1039/d4cc03857f), 2024-01-01
Supplement: d4cc03857f1.pdf [file d4cc03857f1.pdf]

## **Low-Temperature De-alloying and Unique Self-filling Interface Optimization Mechanism of Layered Silicon for Enhanced Lithium Storage**

Wanling Ji<sup>a</sup>, Minghuang Li<sup>a</sup>, Yutong Nong<sup>a</sup>, Jie Luo<sup>a</sup>, Xinglong Liang<sup>a</sup>, Xiaowei Wang<sup>a\*</sup>, Lei Ming<sup>a</sup>, Xing Ou<sup>a</sup>, Jiafeng Zhang<sup>a\*</sup>, Bao Zhang<sup>a</sup>, Xuwang Fu<sup>b</sup>, Lei Dong<sup>b</sup>, Jianmin Feng<sup>b\*</sup>, Ji Liang<sup>c\*</sup>

<sup>a</sup> *National Engineering Laboratory for High-Efficiency Recovery of Refractory Nonferrous Metals, School of Metallurgy and Environment, Central South University, Changsha 410083, PR China. Email: yjzjf@csu.edu.cn. (J-F. Zhang)*

<sup>b</sup> *College of Physics and Materials Science, Tianjin Normal University, No 393 Bin Shui West Road, Xiqing District, Tianjin 300387, China. E-mail: jmfeng@tjnu.edu.cn*

<sup>c</sup> *School of Materials Science and Engineering, Tianjin University, China. E-mail: liangji@tju.edu.cn*

### **Table of contents**

- 1. Vapor-Dealloying Preparation of Layered Silicon (L-Si)**
- 2. The Application of L-Si for Lithium Storage**
- 3. Cyclic Voltammetry (CV)**
- 4. Supporting Figures**

## 1. Vapor-Dealloying Preparation of Layered Silicon (L-Si)

**Sample preparation.** Mix the raw materials ammonium chloride ( $\text{NH}_4\text{Cl}$ ) and calcium silicate ( $\text{CaSi}_2$ ) evenly, and then heat them in a tube furnace to  $300^\circ\text{C}$ .  $\text{CaSi}_2$  is used as a silicon source, and  $\text{NH}_4\text{Cl}$  is thermally decomposed into  $\text{HCl}$  gas and  $\text{NH}_3$  gas. An argon gas stream is passed through a tube furnace at a flow rate of 100 ml/min. Under these conditions,  $\text{HCl}$  gas will react with  $\text{CaSi}_2$  to form  $\text{CaCl}_2$  and layered silicon. The as-prepared product was washed by pure water to remove  $\text{CaCl}_2$ , and layered silicon was obtained.

**Materials Characterization.** SEM observations and EDS analysis (SEM, TDCLS-8010, Hitachi Japan) is conducted as follows: the as-prepared product is dispersed in ethanol and dipped onto conductive tape as the analysis sample. In the same way, the as-prepared product ethanol solution is dropped copper grids coating with carbon film for TEM observation and EDX analysis (TEM, Talos F200X, FEI, US). The structure of the as-prepared products is analyzed by X-ray diffraction (XRD, D8 Advance, Bruker, German) and Raman spectroscopy (Horiba Jobin Yvon, LabRAM HR800, 17 mW, 514 nm, He-Ne laser), respectively. The surface chemistry of L-Si is analyzed by X-ray photoelectronic spectroscopy (XPS, Perkin-Elmer, PHI-1600, US).

## 2. The Application of L-Si for Lithium Storage

L-Si, acetylene carbon, carboxymethyl cellulose (CMC, dispersed in deionized water) are mixed as a weight percent of 7:2:1. Then the slurry is coated on Cu foil by a blade and dried at  $90^\circ\text{C}$  in a vacuum oven. The electrodes are punched into 12 mm disks for battery assembling. The counter electrode is a disk of lithium metal, and the separator is Celgard 2400. The electrolyte is 1 M  $\text{LiPF}_6$  dissolved in a mixture of diethyl carbonate and ethylene carbonate (1:1 in volume) with 30% (volume ratio) Fluoroethylene carbonate additives. The assembly of the coin type half-cells is carried out in a glove box whose contents of  $\text{H}_2\text{O}$  and  $\text{O}_2$  are less than 0.1 ppm. The working potential ranges from 0.01 to 3.0 V.

Cyclic Voltammetry (CV) analysis is carried out with a Princeton electrochemical workstation. Galvanostatic charge/discharge testing are conducted in the voltage range of 0.01-3.0 V (vs. $\text{Li}/\text{Li}^+$ ) using a LAND multichannel battery test system.

## 3. Cyclic Voltammetry (CV)

The electrochemical behavior of the L-Si towards Li storage has been further investigated using cyclic voltammetry (CV). The CV curves under various scanning rates from 0.2 to  $1.0 \text{ mV s}^{-1}$

display similar but higher cathodic/anodic peaks intensity during lithiation/delithiation processes with the increase of scanning rates (**Fig. S5a, b, c**). Generally speaking, the lithium-ion storage mechanism includes battery behavior and pseudocapacitive behavior, which are controlled by diffusion and adsorption processes, respectively. The presence of pseudocapacitive behavior during the charging and discharging process can be calculated using the following formula:

$$i = av^b (0.5 \leq b \leq 1)$$

$$\log i = b \log v + \log a$$

where  $a$  is a constant,  $i$  is peak current, and  $v$  is scan rate. If the  $b$  value is 0.5, the electrode material exhibits battery behavior and is controlled by the diffusion process. If the  $b$  value is 1.0, the electrode material exhibits pseudocapacitive behavior, which is controlled by the adsorption process. If the  $b$  value is between 0.5 and 1.0, the electrode material exhibits battery behavior and pseudocapacitive behavior. As shown in **Fig. S5d**, the calculated  $b$  value of the L-Si anode is 0.94, indicating that the L-Si anode is a lithium storage mechanism dominated by pseudocapacitive behavior.

Calculate the specific contribution ratio of pseudocapacitive behavior and battery behavior at a specific scanning speed using the following formula:

$$i = k_1 v + k_2 v^{1/2}$$

or

$$\frac{i}{v^{1/2}} = k_1 v^{1/2} + k_2$$

where  $k_1$ ,  $k_2$  are constants. At a given potential, the terms  $k_1 v$  and  $k_2 v^{1/2}$  represent the current response due to the capacitive process and diffusion-controlled faradaic process, respectively. The  $k_1$  and  $k_2$  can be calculated by plotting  $i/v^{1/2}$  vs.  $v^{1/2}$ , thus the fraction of the charge from the capacitive process and diffusion-controlled process could be determined.

As shown in **Fig. S5e**, the capacitive process contribution of L-Si anode is 81.1% and the diffusion process contributes 18.9% of the total capacity, respectively. Contribution ratios between the two processes under different scan rates were also quantified.

**Fig. S5f** shows that the capacitive current ratio increased gradually with the increase of scanning rates, from 84% at 0.2 mV s<sup>-1</sup> to 92% at 1.0 mV s<sup>-1</sup>. The high ratio capacitive lithium storage contribution of L-Si indicates the adsorption and migration lithium storage mechanism.

#### 4. Supporting Figures

Figure S1. Thermogravimetric curves of ammonium chloride and calcium silicate

Figure S2. Schematic diagram of synthesis equipment of layered silicon.

Figure S3. (a) Infrared spectrum, (b) Raman spectrum, (c) XPS spectrum of Si 2p, and (d) BET curve of L-Si.

Figure S4. XRD spectra of materials involved in in-situ XRD testing.

Figure S5. Relevant charge-discharge curves under different current densities in Figure 3d.

Figure S6. The CV curves of L-Si anode with different scan rates were obtained by (a) cycling for 3 times, (b) 150 times, and (c) 1000 times. (d) The relationship between scan rate and peak current, (e) capacitance contribution of cyclic voltammetry curve at a scan rate of  $0.4\text{mV s}^{-1}$ , and the proportion of diffusion and (f) capacitance contribution at different scan rates for CV testing of L-Si anode after 3 cycles.

Figure S7. XPS spectra of L-Si based anode after 3, 150, and 1000 cycles.

Figure S8. FTIR spectra of L-Si based anode after 3, 150, and 1000 cycles.

Figure S9. SEM images and EDS line scan results of electrode cross-section after 3, 150, and 1000 cycles of L-Si based anode.

Figure S10. SEM images and EDS results of the powder particles of L-Si electrode after 3, 150, and 1000 cycles.

Figure S1.

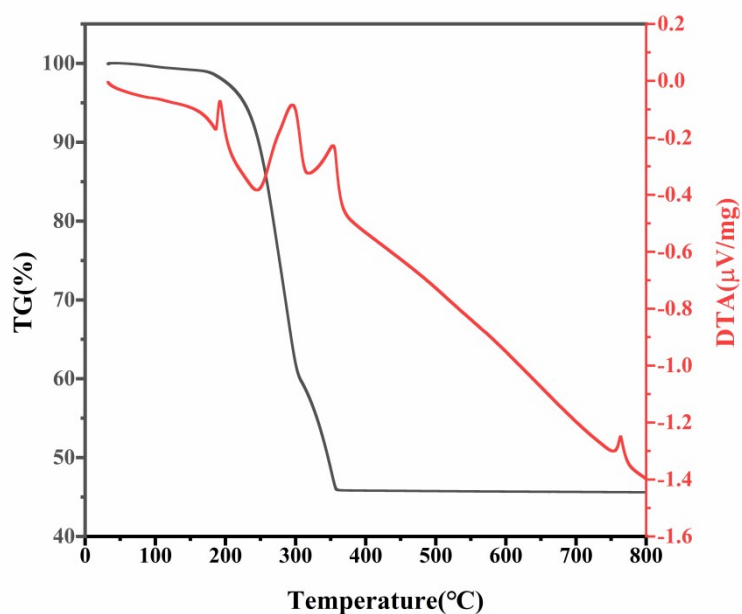

Figure S2.

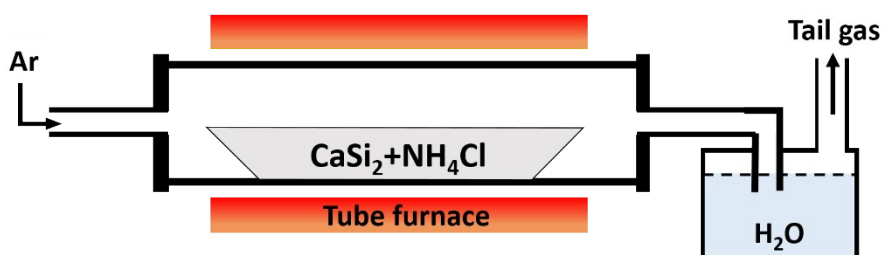

The synthesis equipment diagram of layered silicon is shown in Figure S2, where the thermal decomposition of  $\text{NH}_4\text{Cl}$  and the dealloying of  $\text{CaSi}_2$  are carried out simultaneously in a tube furnace. The decomposition products of  $\text{NH}_4\text{Cl}$  are  $\text{HCl}$  and  $\text{NH}_3$ , among which  $\text{HCl}$  and  $\text{CaSi}_2$  undergo dealloying reaction. Excess or unreacted  $\text{HCl}$ , and another decomposition product  $\text{NH}_3$  will travel with an Ar flow to the tail gas treatment device, which is a simple device filled with water. The reason why the exhaust treatment device is so simple is that the gases  $\text{HCl}$ ,  $\text{NH}_3$ , and even the by-product  $\text{CaCl}_2$  generated in this process can be easily absorbed by water.

Figure S3.

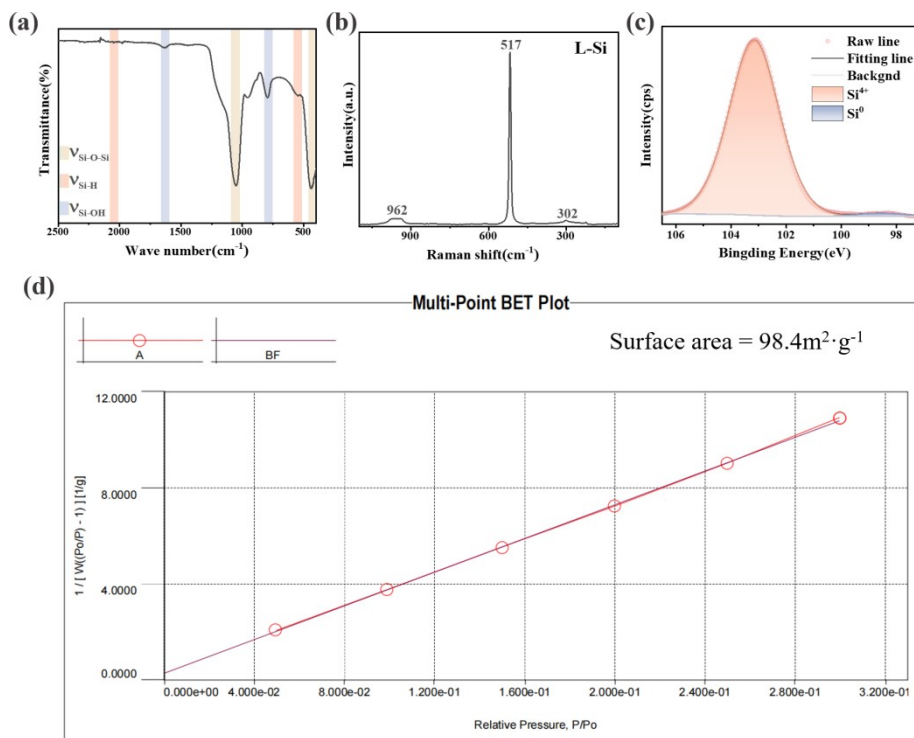

Figure S4.

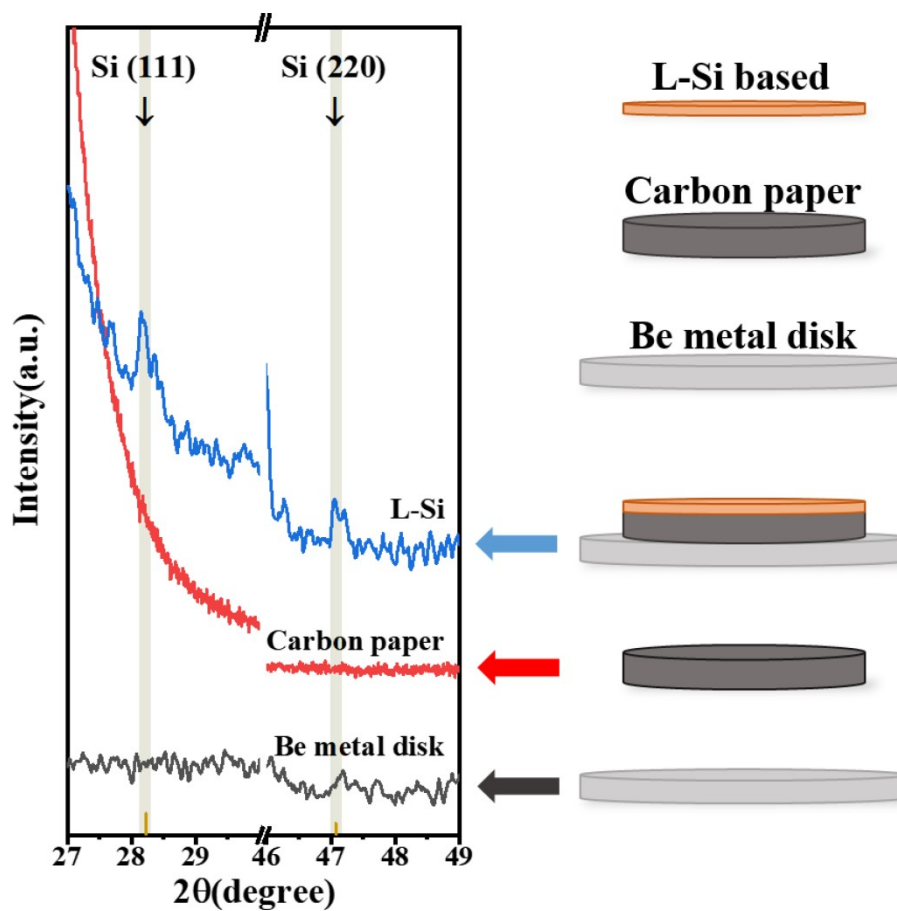

Figure S5.

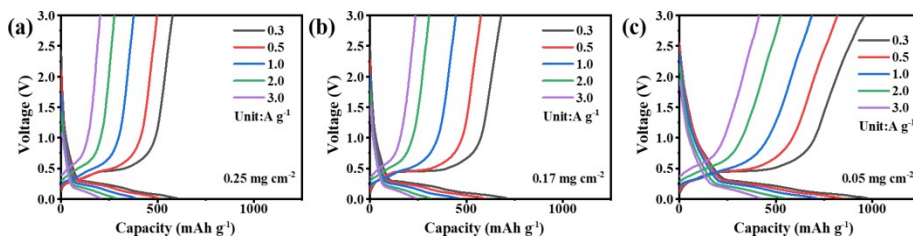

Figure S6.

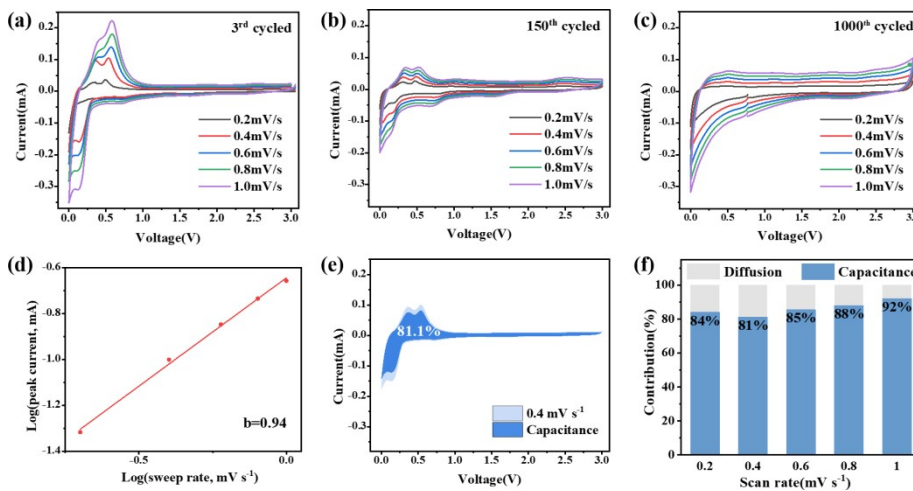

Figure S7.

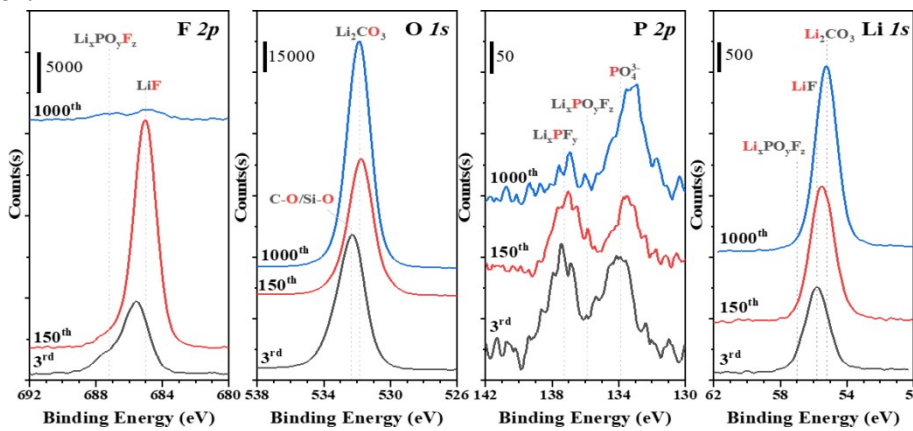

Figure S8.

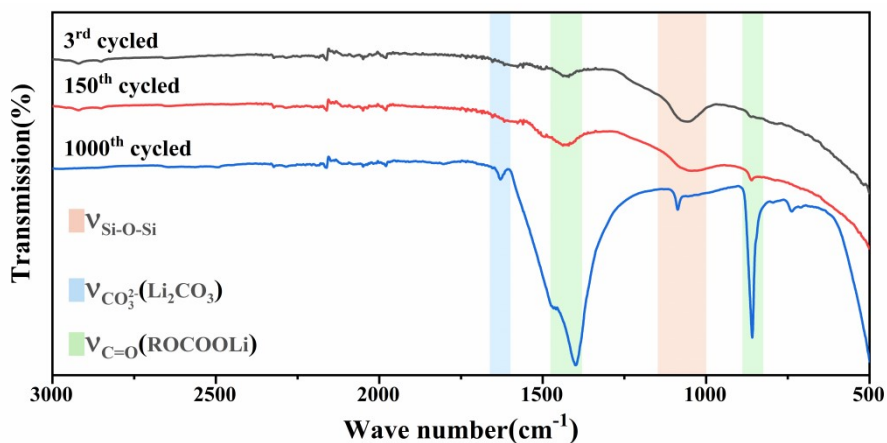

**Figure S9.**

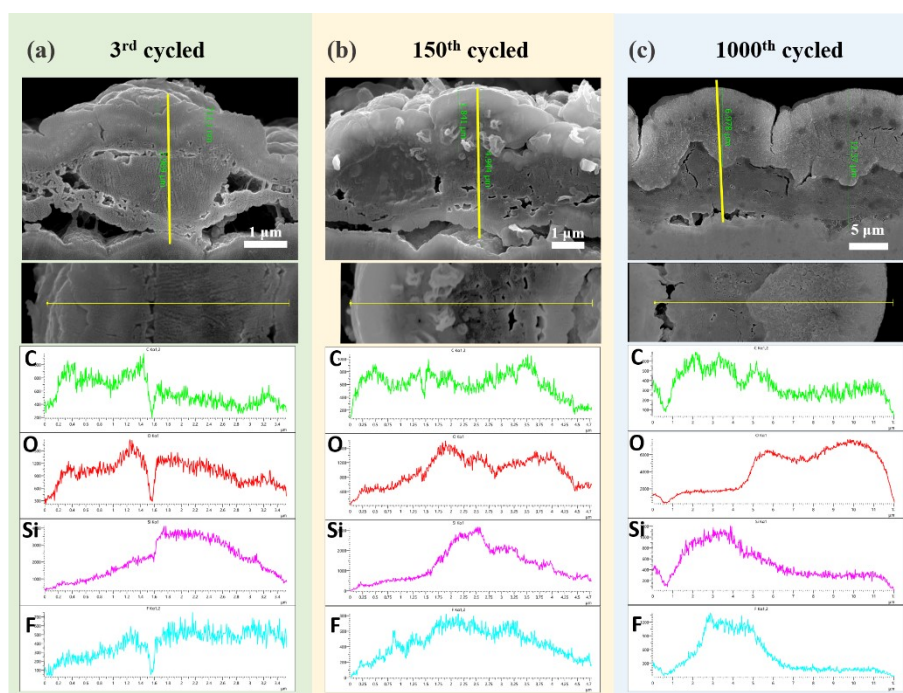

From the SEM images and line scan data of the electrode cross-section after 3, 150, and 1000 cycles, it can be analyzed that the lighter surface layer contains SEI film with C and O elements, while the darker interior is silicon (Si). The thickness of the electrode after 3 cycles is 2.99 μm, of which the thickness of the SEI film is only 711.1 nm. At this stage, a layered structure of Si can be observed, and there are numerous voids in the electrode. By 150 cycles, the contact between the active material and the current collector becomes worse due to the volume expansion of the Si material. The thickness of the electrode increases to 4.94 μm, and the SEI film thickness is 1.84 μm at this stage. In addition, the EDS line scan results show that the C element becomes more evenly distributed inside the electrode. The thickness of the electrode increased to 12.37 μm, and the SEI film thickness was 6.98 μm after 1000 cycles. Although the thickness of the electrode has increased significantly at this stage, the large number of voids have disappeared, and the contact between the active material and the current collector has become very tight.

**Figure S10.**

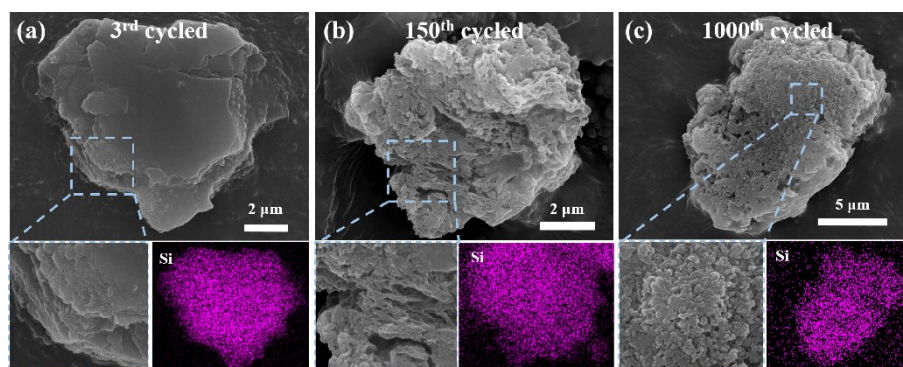

Furthermore, SEM characterization and EDS analysis were performed on the L-Si negative electrode material particles at each cycle stage (Figure S9). It can be observed that the Si in the



electrode material after 3 cycles is a tightly layered structure, while at 150 cycles, the tightly stacked layered silicon transforms into sheet-like silicon with fluffy folds. After 1000 cycles, the silicon observed is composed of many small fragments aggregated, and no layered or sheet-like structure can be observed. At this stage, it can be seen that the layered silicon has broken into small fragments and is tightly cross-linked with various components of the electrode, as shown in the TEM image (Figure 4e).
